# Supplementary material for: A multicoloured Au NCs based cross-reactive sensor array for discrimination of multiple proteins
Source: Royal Society of Chemistry journal article supplement (doi:10.1039/c7tb00367f), 2017-01-01
Supplement: c7tb00367f1.pdf [file c7tb00367f1.pdf]

## Supporting Information

### **Multicoloured Au NCs based cross-reactive sensor array for multiple proteins discrimination**

Shenghao Xu,<sup>a</sup> Yufeng Wu<sup>a</sup>, Xiaomei Sun<sup>c</sup>, Zhuqing Wang<sup>a,b</sup> and Xiliang Luo<sup>a\*</sup>

<sup>a</sup> Key Laboratory of Sensor Analysis of Tumor Marker Ministry of Education, College of Chemistry and Molecular Engineering, Qingdao University of Science and Technology, Qingdao 266042, P. R. China

<sup>b</sup> College of Polymer Science and Engineering, Qingdao University of Science and Technology, Qingdao 266042, P. R. China

<sup>c</sup> The Affiliated Hospital of Qingdao University, Qingdao 266003, P. R. China

#### **\*Corresponding author:**

Prof. Dr. Xiliang Luo, Key Laboratory of Sensor Analysis of Tumor Marker Ministry of Education, College of Chemistry and Molecular Engineering, Qingdao University of Science and Technology, Qingdao 266042, P. R. China, **E-mail:** xiliangluo@qust.edu.cn

---

**Table S1** Basic properties of the target proteins

---

| Proteins                   | M <sub>w</sub> (kDa) | pI       |
|----------------------------|----------------------|----------|
| Human serum albumin (HSA)  | 69.4                 | 5.2      |
| Lysozyme (Lys)             | 14.4                 | 9.6-11.0 |
| Pepsin (Pep)               | 35                   | 1.0-2.5  |
| Hemoglobin (Hb)            | 64.5                 | 6.8      |
| Trypsin (Try)              | 24.0                 | 10.5     |
| Catalse (CAT)              | 247.0                | 8.3      |
| Cytochrome C (Cyt C)       | 12.3                 | 10.7     |
| Transferrin (Tf)           | 77                   | 5.6-6.6  |
| Myoglobin (Myo)            | 17.8                 | 7.6      |
| Bovine serum albumin (BSA) | 68                   | 4.6-5.8  |

---

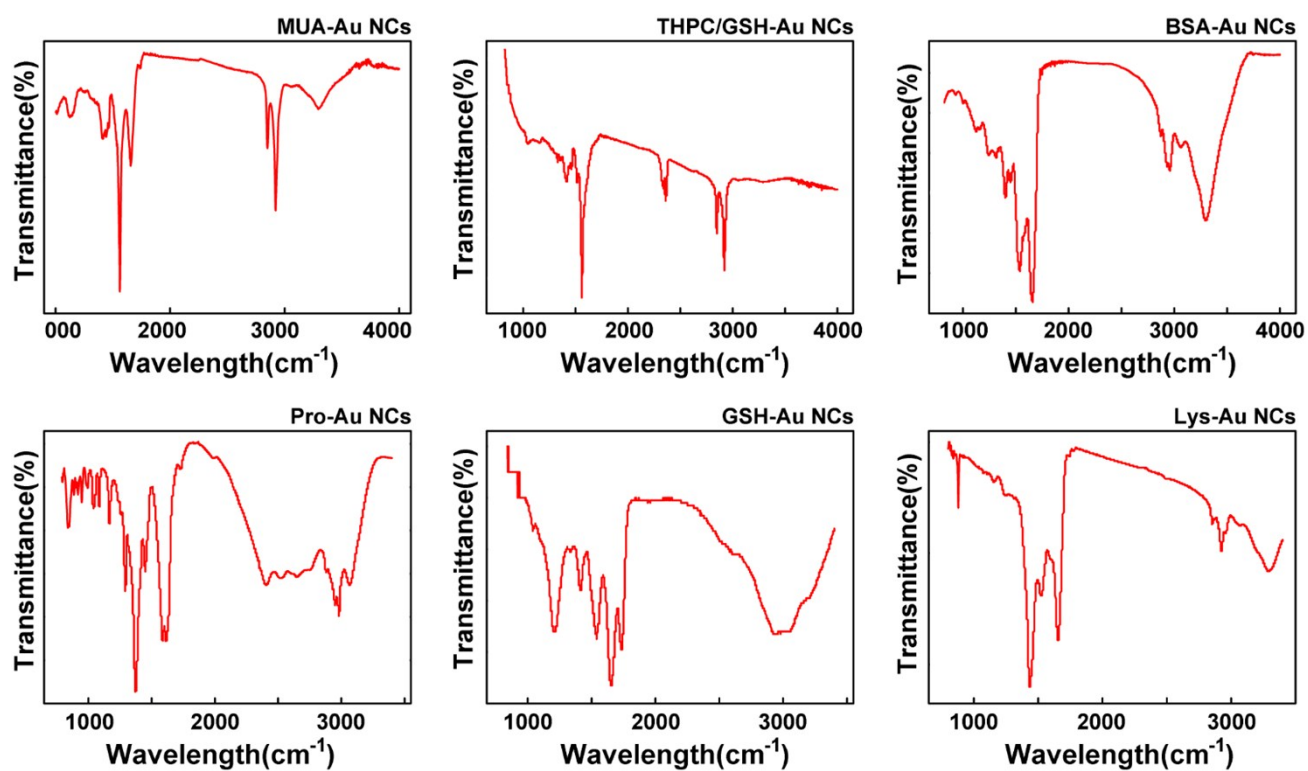

Fig S1 FT-IR spectra of these six kinds of Au NCs.

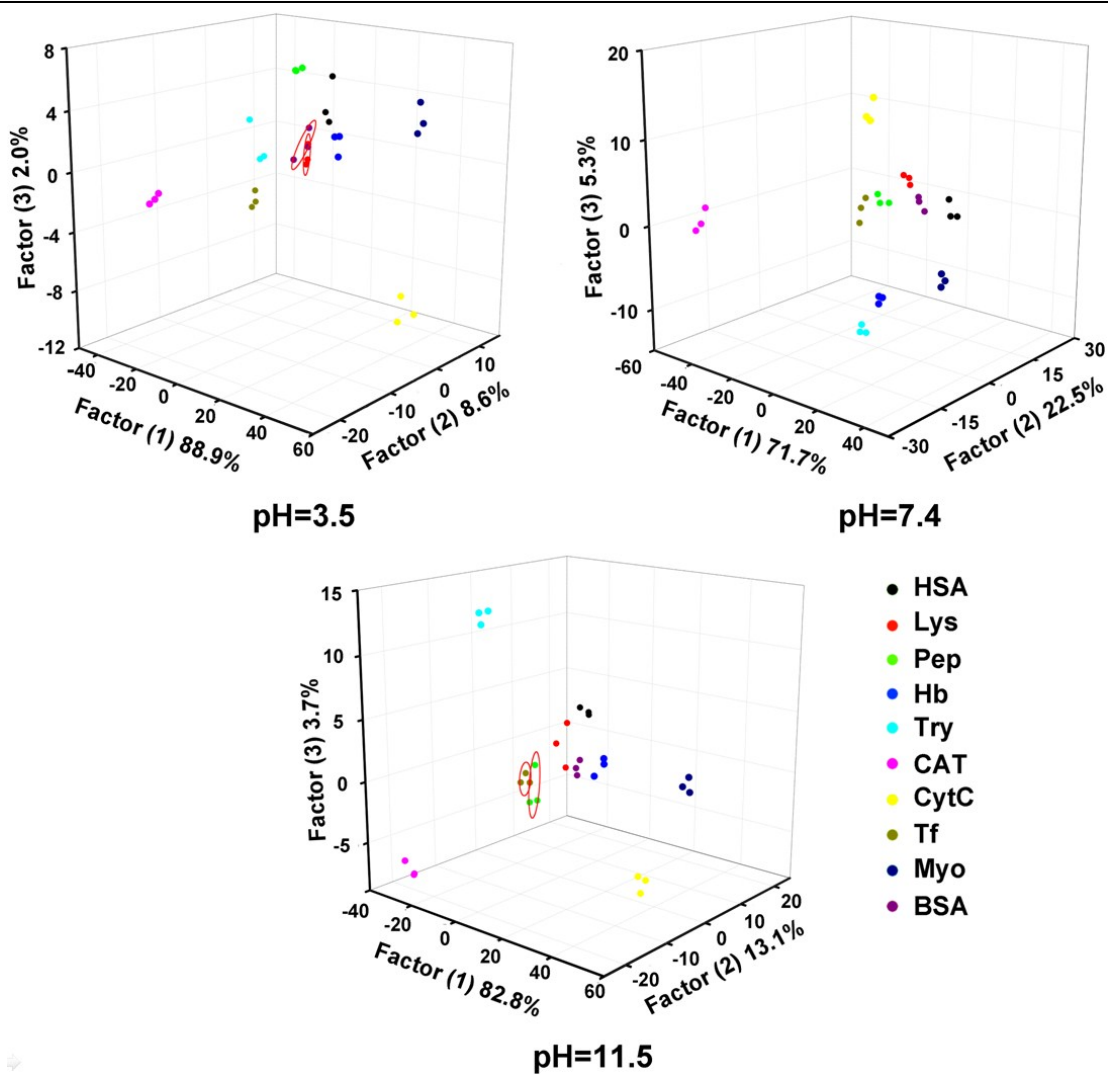

**Fig S2** The influence of pH value on the protein discrimination.

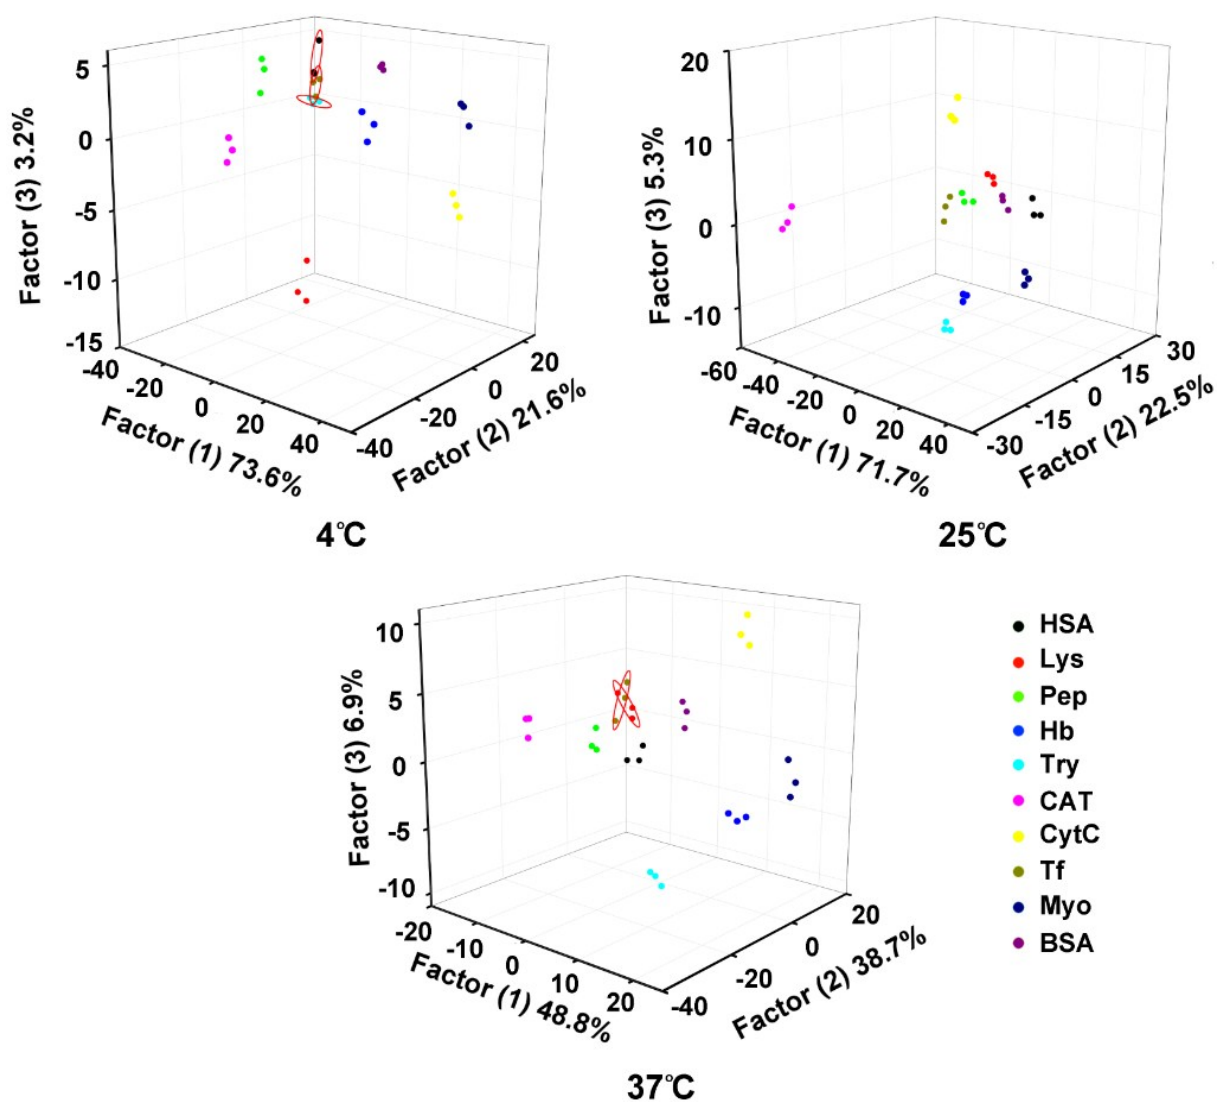

**Fig S3** The influence of temperature on the protein discrimination.

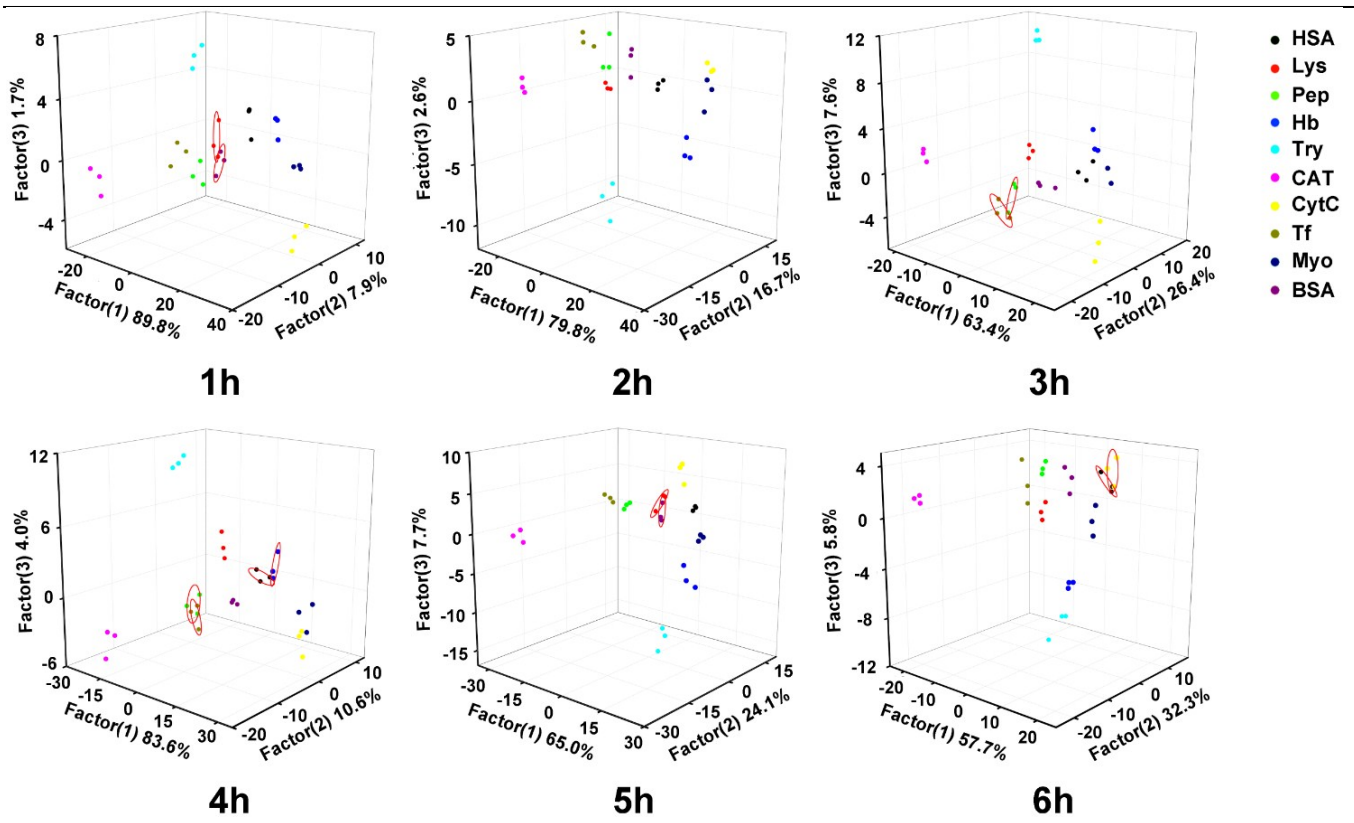

**Fig S4** The influence of time on the protein discrimination.

**Table S2** Relative fluorescence increase  $(I-I_0)/I_0$ 

|      | MUA     | THPC/GSH | BSA     | Pro     | GSH     | Lys     |
|------|---------|----------|---------|---------|---------|---------|
| HSA  | 0.0100  | 0.0175   | 0.0577  | -0.0093 | 0.0370  | 0.0333  |
| Lys  | -0.1542 | -0.0088  | -0.0128 | -0.3194 | -0.0296 | -0.0556 |
| Pep  | -0.0398 | -0.0132  | -0.0577 | -0.0463 | -0.0815 | -0.0444 |
| Hb   | 0.2090  | -0.0263  | 0.1667  | -0.0185 | 0.0815  | 0.0500  |
| Try  | -0.0249 | -0.0482  | 0.0897  | -0.0741 | -0.1704 | -0.0389 |
| CAT  | -0.0050 | -0.1009  | -0.1410 | -0.1667 | -0.2593 | -0.1778 |
| CytC | 0.2289  | 0.0132   | 0.1090  | 0.0509  | 0.1259  | 0.1000  |
| Tf   | -0.0796 | -0.0395  | -0.0962 | -0.0694 | -0.0889 | -0.0667 |
| Myo  | 0.2289  | -0.0132  | 0.1410  | 0.0093  | 0.1481  | 0.0944  |
| BSA  | 0.0100  | -0.0044  | -0.0128 | -0.0370 | -0.0222 | -0.0111 |

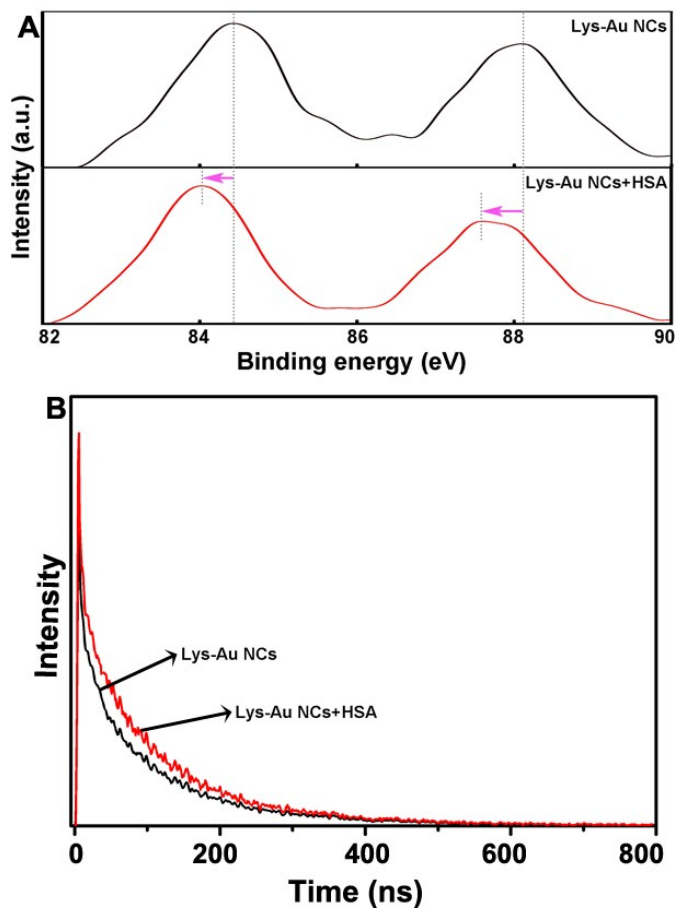

**Fig. S5** (A) XPS spectrum of Au<sub>4f</sub> for Lys-Au NCs and Lys-Au NCs + HSA. (B) Fluorescence lifetime of Lys-Au NCs and Lys-Au NCs + HSA.



**Table S3** Identification of 50 unknown protein samples in urine

| #  | Relative fluorescence increase (I-I <sub>0</sub> )/I <sub>0</sub> |          |         |        |         |        | Identi. | Verifi. |
|----|-------------------------------------------------------------------|----------|---------|--------|---------|--------|---------|---------|
|    | MUA                                                               | THPC/GSH | BSA     | Pro    | GSH     | Lys    |         |         |
| 1  | 0.1632                                                            | -0.0058  | 0.1104  | 0.0420 | 0.0674  | 0.0733 | HSA     | HSA     |
| 2  | 0.2757                                                            | -0.0016  | 0.3413  | 0.0569 | 0.0874  | 0.1148 | Lys     | Lys     |
| 3  | 0.1767                                                            | 0.0345   | 0.1567  | 0.0549 | 0.1009  | 0.0870 | Pep     | Pep     |
| 4  | 0.0692                                                            | 0.0360   | 0.1953  | 0.1000 | 0.1604  | 0.1381 | CAT     | CAT     |
| 5  | 0.2637                                                            | -0.0179  | 0.3225  | 0.0542 | 0.0851  | 0.0983 | Lys     | Lys     |
| 6  | 0.1437                                                            | -0.0039  | 0.0819  | 0.0319 | 0.0529  | 0.0757 | HSA     | HSA     |
| 7  | 0.1663                                                            | 0.0340   | 0.1695  | 0.0573 | 0.1272  | 0.0998 | Pep     | Pep     |
| 8  | 0.2748                                                            | -0.0003  | 0.3550  | 0.0559 | 0.0824  | 0.1037 | Lys     | Lys     |
| 9  | 0.0449                                                            | -0.0146  | 0.0946  | 0.0333 | 0.0408  | 0.0484 | BSA     | BSA     |
| 10 | 0.1387                                                            | 0.0555   | 0.0275  | 0.0552 | 0.1490  | 0.0851 | Try     | Try     |
| 11 | 0.1785                                                            | 0.0193   | 0.1220  | 0.0524 | 0.0548  | 0.0898 | Tf      | Tf      |
| 12 | 0.0578                                                            | -0.0140  | 0.0939  | 0.0307 | 0.0377  | 0.0471 | BSA     | BSA     |
| 13 | 0.1417                                                            | 0.0598   | 0.0102  | 0.0638 | 0.1323  | 0.0741 | Try     | Try     |
| 14 | 0.1395                                                            | -0.0056  | 0.0839  | 0.0293 | 0.0694  | 0.0625 | HSA     | HSA     |
| 15 | 0.1679                                                            | 0.0199   | 0.1219  | 0.0522 | 0.0524  | 0.1021 | Tf      | Tf      |
| 16 | -0.0779                                                           | -0.0536  | -0.1317 | 0.0061 | -0.0211 | 0.0252 | CytC    | CytC    |
| 17 | -0.0726                                                           | -0.0609  | 0.0264  | 0.0103 | -0.0056 | 0.0217 | Myo     | Myo     |
| 18 | -0.0757                                                           | -0.0536  | -0.1160 | 0.0200 | -0.0206 | 0.0127 | CytC    | CytC    |
| 19 | 0.0665                                                            | 0.0344   | 0.1997  | 0.1122 | 0.1729  | 0.1364 | CAT     | CAT     |
| 20 | 0.0458                                                            | -0.0169  | 0.0812  | 0.0296 | 0.0446  | 0.0467 | BSA     | BSA     |
| 21 | 0.1391                                                            | 0.0585   | 0.0080  | 0.0573 | 0.1141  | 0.0774 | Try     | Try     |
| 22 | 0.0554                                                            | -0.0247  | 0.0800  | 0.0183 | 0.0427  | 0.0474 | BSA     | BSA     |
| 23 | -0.0638                                                           | -0.0275  | 0.0386  | 0.0327 | 0.0134  | 0.0389 | Hb      | Hb      |
| 24 | 0.1628                                                            | 0.0187   | 0.1260  | 0.0658 | 0.0688  | 0.0892 | Tf      | Tf      |
| 25 | -0.0754                                                           | -0.0625  | 0.0260  | 0.0201 | -0.0021 | 0.0072 | Myo     | Myo     |
| 26 | -0.0740                                                           | -0.0541  | -0.1207 | 0.0098 | -0.0021 | 0.0203 | CytC    | CytC    |
| 27 | 0.1388                                                            | 0.0550   | 0.0087  | 0.0565 | 0.1341  | 0.0877 | Try     | Try     |
| 28 | 0.1636                                                            | 0.0194   | 0.1279  | 0.0550 | 0.0420  | 0.0753 | Tf      | Tf      |
| 29 | 0.0572                                                            | 0.0313   | 0.1996  | 0.1124 | 0.1593  | 0.1508 | CAT     | CAT     |
| 30 | 0.2477                                                            | -0.0053  | 0.3255  | 0.0559 | 0.0839  | 0.1008 | Lys     | Lys     |
| 31 | 0.1647                                                            | 0.0353   | 0.1545  | 0.0569 | 0.1322  | 0.1023 | Pep     | Pep     |
| 32 | 0.0698                                                            | 0.0340   | 0.1802  | 0.1119 | 0.1583  | 0.1392 | CAT     | CAT     |
| 33 | 0.1531                                                            | 0.0075   | 0.0848  | 0.0438 | 0.0730  | 0.0588 | HSA     | HSA     |
| 34 | 0.1657                                                            | 0.0194   | 0.1238  | 0.0529 | 0.0401  | 0.0721 | Tf      | Tf      |
| 35 | -0.0735                                                           | -0.0607  | 0.0395  | 0.0096 | -0.0057 | 0.0220 | Myo     | Myo     |
| 36 | 0.0703                                                            | 0.0199   | 0.1801  | 0.1024 | 0.1594  | 0.1532 | CAT     | CAT     |
| 37 | 0.1440                                                            | 0.0591   | 0.0103  | 0.0544 | 0.1314  | 0.0870 | Try     | Try     |
| 38 | -0.0492                                                           | -0.0260  | 0.0218  | 0.0324 | -0.0037 | 0.0470 | Hb      | Hb      |
| 39 | -0.0657                                                           | -0.0266  | 0.0283  | 0.0293 | -0.0064 | 0.0508 | Hb      | Hb      |

---

|    |         |         |         |        |         |        |      |      |
|----|---------|---------|---------|--------|---------|--------|------|------|
| 40 | -0.0499 | -0.0282 | 0.0088  | 0.0326 | 0.0129  | 0.0358 | Hb   | Hb   |
| 41 | -0.0869 | -0.0483 | -0.1347 | 0.0085 | -0.0202 | 0.0093 | CytC | CytC |
| 42 | 0.1672  | 0.0312  | 0.1376  | 0.0519 | 0.1185  | 0.1036 | Pep  | Pep  |
| 43 | -0.0752 | -0.0529 | -0.1191 | 0.0205 | 0.0134  | 0.0122 | CytC | CytC |
| 44 | -0.0748 | -0.0767 | 0.0250  | 0.0178 | -0.0219 | 0.0231 | Myo  | Myo  |
| 45 | 0.1657  | 0.0351  | 0.1536  | 0.0553 | 0.0982  | 0.1024 | Pep  | Pep  |
| 46 | 0.0432  | -0.0162 | 0.0963  | 0.0325 | 0.0400  | 0.0513 | BSA  | BSA  |
| 47 | 0.2745  | -0.0161 | 0.3076  | 0.0550 | 0.0850  | 0.0996 | Lys  | Lys  |
| 48 | -0.0758 | -0.0607 | 0.0391  | 0.0106 | 0.0000  | 0.0201 | Myo  | Myo  |
| 49 | -0.0608 | -0.0261 | 0.0399  | 0.0410 | -0.0009 | 0.0459 | Hb   | Hb   |
| 50 | 0.1544  | -0.0051 | 0.0953  | 0.0434 | 0.0731  | 0.0593 | HSA  | HSA  |

---

**Table S4** Identification of 50 unknown protein samples in human serum

| #  | Relative fluorescence increase (I-I <sub>0</sub> )/I <sub>0</sub> |          |         |         |         |         | Identi. | Verifi. |
|----|-------------------------------------------------------------------|----------|---------|---------|---------|---------|---------|---------|
|    | MUA                                                               | THPC/GSH | BSA     | Pro     | GSH     | Lys     |         |         |
| 1  | 0.1838                                                            | 0.0384   | 0.0783  | 0.0868  | 0.0621  | 0.1103  | Tf      | Tf      |
| 2  | 0.1149                                                            | 0.0527   | -0.0567 | 0.0776  | 0.1188  | 0.0669  | Try     | Try     |
| 3  | -0.1926                                                           | -0.1065  | -0.1392 | 0.0387  | -0.0705 | 0.0086  | Hb      | Hb      |
| 4  | -0.1663                                                           | -0.1070  | 0.0160  | 0.0356  | -0.0163 | 0.0429  | Myo     | Myo     |
| 5  | 0.1884                                                            | 0.0425   | 0.1001  | 0.0894  | 0.0658  | 0.0984  | Tf      | Tf      |
| 6  | 0.1841                                                            | 0.0389   | 0.0776  | 0.0778  | 0.0652  | 0.1029  | Tf      | Tf      |
| 7  | 0.1431                                                            | -0.0157  | 0.0633  | 0.0590  | 0.0855  | 0.0547  | Pep     | Pep     |
| 8  | 0.1387                                                            | -0.0914  | 0.2638  | 0.0259  | -0.0163 | 0.0423  | Lys     | Lys     |
| 9  | 0.0266                                                            | 0.0104   | 0.0985  | 0.1932  | 0.1807  | 0.1414  | CAT     | CAT     |
| 10 | 0.0849                                                            | -0.0716  | -0.0182 | 0.0090  | -0.0472 | -0.0065 | HSA     | HSA     |
| 11 | 0.1262                                                            | -0.0213  | 0.0501  | 0.0510  | 0.0669  | 0.0434  | Pep     | Pep     |
| 12 | -0.1809                                                           | -0.1025  | -0.2264 | 0.0096  | -0.1042 | -0.0204 | CytC    | CytC    |
| 13 | 0.1292                                                            | -0.0171  | 0.0652  | 0.0605  | 0.0644  | 0.0829  | BSA     | BSA     |
| 14 | 0.0819                                                            | -0.0894  | -0.0531 | -0.0009 | -0.0302 | -0.0008 | HSA     | HSA     |
| 15 | -0.1912                                                           | -0.1190  | -0.2113 | 0.0116  | -0.1242 | -0.0336 | CytC    | Myo     |
| 16 | 0.1290                                                            | -0.0192  | 0.0645  | 0.0460  | 0.0590  | 0.0695  | BSA     | BSA     |
| 17 | 0.1990                                                            | 0.0370   | 0.1001  | 0.0857  | 0.0622  | 0.1149  | Tf      | Tf      |
| 18 | 0.1871                                                            | 0.0409   | 0.0820  | 0.0885  | 0.0641  | 0.0978  | Tf      | Tf      |
| 19 | 0.1135                                                            | 0.0561   | -0.0581 | 0.0769  | 0.1614  | 0.0515  | Try     | Try     |
| 20 | 0.0237                                                            | -0.0171  | 0.0982  | 0.1812  | 0.1756  | 0.1545  | CAT     | CAT     |
| 21 | 0.1700                                                            | -0.0757  | 0.2970  | 0.0201  | -0.0335 | 0.0554  | Lys     | Lys     |
| 22 | 0.0084                                                            | -0.0179  | 0.0811  | 0.1945  | 0.1758  | 0.1427  | CAT     | CAT     |
| 23 | 0.1414                                                            | -0.0179  | 0.0616  | 0.0461  | 0.0854  | 0.0415  | Pep     | Pep     |
| 24 | 0.1256                                                            | -0.0205  | 0.0674  | 0.0586  | 0.0853  | 0.0860  | BSA     | BSA     |
| 25 | -0.1628                                                           | -0.1036  | -0.0021 | 0.0355  | -0.0321 | 0.0280  | Myo     | Myo     |
| 26 | 0.1724                                                            | -0.0902  | 0.2992  | 0.0202  | -0.0108 | 0.0403  | Lys     | Lys     |
| 27 | 0.0950                                                            | -0.0785  | -0.0205 | 0.0097  | -0.0350 | -0.0071 | HSA     | HSA     |
| 28 | 0.1243                                                            | 0.0419   | -0.0580 | 0.0779  | 0.1422  | 0.0549  | Try     | Try     |
| 29 | -0.1895                                                           | -0.1029  | -0.1258 | 0.0335  | -0.0923 | 0.0138  | Hb      | Hb      |
| 30 | -0.1923                                                           | -0.1196  | -0.1363 | 0.0375  | -0.0660 | 0.0102  | Hb      | Hb      |
| 31 | 0.1404                                                            | -0.0320  | 0.0651  | 0.0765  | 0.0679  | 0.0405  | Pep     | Try     |
| 32 | -0.1917                                                           | -0.1190  | -0.1552 | 0.0389  | -0.0882 | 0.0138  | Hb      | Hb      |
| 33 | 0.1240                                                            | -0.0200  | 0.0497  | 0.0646  | 0.0598  | 0.0721  | Pep     | Pep     |
| 34 | -0.1771                                                           | -0.1193  | 0.0139  | 0.0232  | -0.0134 | 0.0435  | Myo     | Myo     |
| 35 | -0.1909                                                           | -0.1197  | -0.2220 | 0.0077  | -0.1457 | -0.0185 | CytC    | CytC    |
| 36 | 0.0275                                                            | -0.0032  | 0.0796  | 0.1945  | 0.1737  | 0.1610  | CAT     | CAT     |
| 37 | -0.1928                                                           | -0.1043  | -0.2280 | 0.0088  | -0.1092 | -0.0349 | CytC    | CytC    |
| 38 | -0.1903                                                           | -0.1204  | -0.1379 | 0.0359  | -0.0661 | 0.0130  | Hb      | Hb      |

|    |         |         |         |         |         |         |      |      |
|----|---------|---------|---------|---------|---------|---------|------|------|
| 39 | 0.0812  | -0.0926 | -0.0405 | -0.0013 | -0.0528 | -0.0007 | HSA  | HSA  |
| 40 | 0.1559  | -0.0899 | 0.2649  | 0.0196  | -0.0129 | 0.0399  | Lys  | Lys  |
| 41 | -0.1660 | -0.1001 | -0.0025 | 0.0199  | -0.0271 | 0.0372  | Myo  | Myo  |
| 42 | -0.1935 | -0.1198 | -0.2269 | 0.0125  | -0.1278 | -0.0177 | CytC | CytC |
| 43 | 0.1297  | -0.0179 | 0.0780  | 0.0624  | 0.0819  | 0.0876  | BSA  | BSA  |
| 44 | 0.1276  | 0.0370  | -0.0734 | 0.0771  | 0.1563  | 0.0678  | Try  | Try  |
| 45 | 0.1264  | 0.0404  | -0.0559 | 0.0746  | 0.1431  | 0.0668  | Try  | Try  |
| 46 | 0.0950  | -0.0760 | -0.0421 | 0.0105  | -0.0660 | -0.0009 | HSA  | HSA  |
| 47 | -0.1629 | -0.1187 | -0.0023 | 0.0203  | -0.0266 | 0.0264  | Myo  | Myo  |
| 48 | 0.1872  | -0.0901 | 0.3024  | 0.0215  | -0.0109 | 0.0396  | Lys  | Lys  |
| 49 | 0.1264  | -0.0160 | 0.0784  | 0.0455  | 0.0873  | 0.0703  | BSA  | BSA  |
| 50 | 0.0246  | -0.0064 | 0.0984  | 0.1766  | 0.1763  | 0.1583  | CAT  | CAT  |

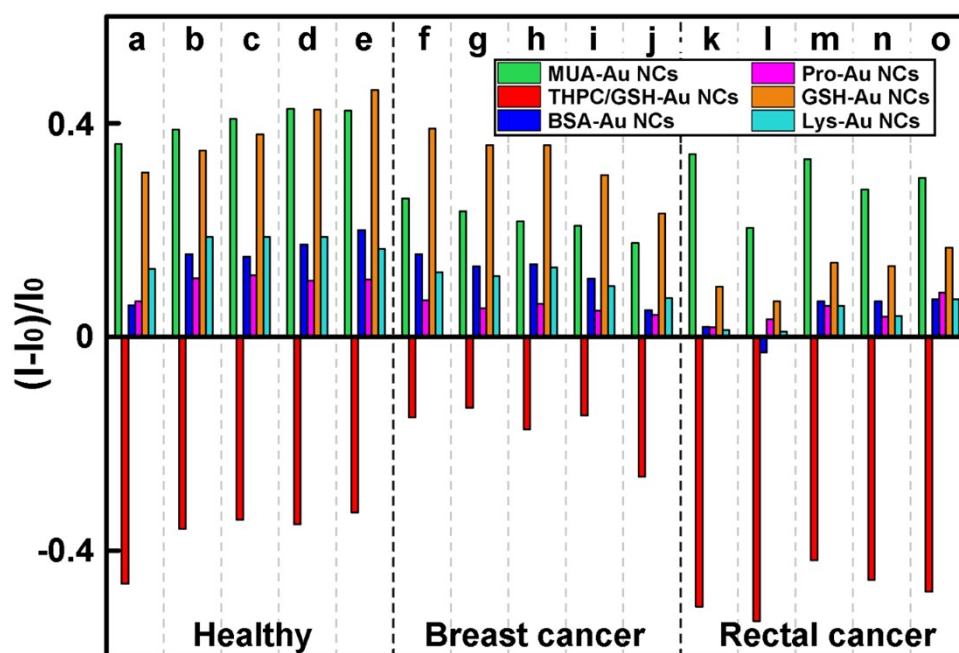

**Fig. S6** Fluorescence response histogram of the six kinds of Au NCs against healthy people, breast cancer patients and rectal cancer patients.

| <b>Table S5</b> Relative fluorescence increase $(I-I_0)/I_0$ |       |          |        |       |       |       |
|--------------------------------------------------------------|-------|----------|--------|-------|-------|-------|
|                                                              | MUA   | THPC/GSH | BSA    | Pro   | GSH   | Lys   |
| Healthy                                                      | 0.361 | -0.462   | 0.059  | 0.067 | 0.308 | 0.127 |
|                                                              | 0.388 | -0.360   | 0.155  | 0.110 | 0.349 | 0.187 |
|                                                              | 0.408 | -0.342   | 0.150  | 0.115 | 0.379 | 0.187 |
|                                                              | 0.427 | -0.351   | 0.173  | 0.105 | 0.426 | 0.187 |
|                                                              | 0.424 | -0.329   | 0.200  | 0.108 | 0.462 | 0.165 |
| Breast cancer                                                | 0.259 | -0.151   | 0.155  | 0.069 | 0.390 | 0.121 |
|                                                              | 0.235 | -0.133   | 0.132  | 0.054 | 0.359 | 0.114 |
|                                                              | 0.216 | -0.173   | 0.136  | 0.062 | 0.359 | 0.130 |
|                                                              | 0.208 | -0.147   | 0.109  | 0.049 | 0.303 | 0.095 |
|                                                              | 0.176 | -0.262   | 0.050  | 0.041 | 0.231 | 0.073 |
| Rectal cancer                                                | 0.342 | -0.505   | 0.019  | 0.018 | 0.094 | 0.013 |
|                                                              | 0.204 | -0.532   | -0.029 | 0.033 | 0.067 | 0.010 |
|                                                              | 0.333 | -0.418   | 0.067  | 0.058 | 0.139 | 0.058 |
|                                                              | 0.276 | -0.455   | 0.067  | 0.038 | 0.133 | 0.039 |
|                                                              | 0.298 | -0.477   | 0.071  | 0.083 | 0.167 | 0.071 |
